# Supplementary material for: Impact of Lipoprotein Lipase Gene Polymorphism, S447X, on Postprandial Triacylglycerol and Glucose Response to Sequential Meal Ingestion
Source: PubMed Central journal article supplement (PMC4813252; doi:10.3390/ijms17030397), 2016-03-18
Supplement: ijms-17-00397-s001.pdf [file ijms-17-00397-s001.pdf]

# Supplementary Materials: Impact of Lipoprotein Lipase Gene Polymorphism, S447X, on Postprandial Triacylglycerol and Glucose Response to Sequential Meal Ingestion

Israa M. Shatwan, Anne-Marie Minihane, Christine M. Williams, Julie A. Lovegrove, Kim G. Jackson and Karani S. Vimaleswaran

**Table S1.** Baseline and postprandial characteristics of participants according to the *LPL-HindIII* polymorphism.

| Participant's Characteristics   | <i>HindIII</i> rs320 |                         | <i>p</i> Value |
|---------------------------------|----------------------|-------------------------|----------------|
|                                 | H1 ( <i>n</i> = 131) | H1/H2 ( <i>n</i> = 100) |                |
| Age (years)                     | 53 ±11               | 52 ±10                  | 0.567          |
| BMI (kg/m <sup>2</sup> )        | 26.0 ±3.4            | 26.6 ±3.1               | 0.095          |
| TC (mmol/L)                     | 5.62 ±1.02           | 5.67 ±1                 | 0.517          |
| TAG (mmol/L)                    | 1.53 ±0.87           | 1.55 ±0.65              | 0.972          |
| HDL-C (mmol/L)                  | 1.35 ±0.42           | 1.36 ±0.39              | 0.526          |
| LDL-C (mmol/L)                  | 3.59 ±0.96           | 3.59 ±0.98              | 0.872          |
| Glucose (mmol/L)                | 5.14 ±0.69           | 5.10 ±0.50              | 0.413          |
| Insulin (pmol/L)                | 45.9 ±30.0           | 52.2 ±31.9              | 0.414          |
| NEFA (µmol/L)                   | 530 ±200             | 498 ±173                | 0.177          |
| HOMA-IR                         | 1.87 ±1.36           | 2.06 ±1.35              | 0.680          |
| TAG AUC (mmol/L × 480 min)      | 1086 ±549            | 1098 ±464               | 0.947          |
| TAG IAUC (mmol/L × 480 min)     | 321 ± 212            | 335 ±230                | 0.677          |
| NEFA AUC (mmol/L × 300 min)     | 155 ± 40             | 153 ± 49                | 0.600          |
| NEFA IAUC (mmol/L × 300 min)    | 99 ± 33              | 94 ± 45                 | 0.231          |
| Glucose AUC (mmol/L × 480 min)  | 3109 ± 408           | 2958 ± 705              | 0.065          |
| Glucose IAUC (mmol/L × 480 min) | 590 ± 287            | 558 ± 269               | 0.648          |
| Insulin AUC (nmol/L × 480 min)  | 128 ± 59             | 134 ± 130               | 0.782          |
| Insulin IAUC (nmol/L × 480 min) | 105 ± 54             | 109 ± 125               | 0.879          |

Values are mean ± standard deviation; *p*-Values are from a linear model testing the association with *LPL* genotypes, adjusted for age, gender, BMI; Abbreviations: TC, total cholesterol; TAG, triacylglycerol; HDL-C, high density lipoprotein cholesterol; LDL-C, low density lipoprotein cholesterol; NEFA, non-esterified fatty acids; HOMA-IR, homeostasis model assessment-insulin resistance, AUC, area under the curve; IAUC, incremental area under the curve; The fasting and postprandial insulin and HOMA-IR values were not available for all participants (*n* = 151).

**Table S2.** Distribution of study individuals according to *HindIII* and S447X Combined Genotypes.

| <i>S447X-HindIII</i> | S/S | S/X | X/X |
|----------------------|-----|-----|-----|
| H1/H1                | 131 | 0   | 0   |
| H1/H2                | 55  | 45  | 0   |
| H2/H2                | 0   | 0   | 0   |

**Table S3.** Association between the combined genotypes of *LPL S447X-HindIII* polymorphisms and fasting and postprandial characteristics.

| Participant's Characteristics  | <i>S447X-HindIII</i>    |                          |                          | <i>p</i> Value |
|--------------------------------|-------------------------|--------------------------|--------------------------|----------------|
|                                | SS/H1<br><i>n</i> = 131 | SX/H1H2<br><i>n</i> = 45 | SS/H1H2<br><i>n</i> = 55 |                |
| Age (years)                    | 53 ± 11                 | 52 ± 11                  | 52 ± 9                   | 0.570          |
| BMI (kg/m <sup>2</sup> )       | 25.98 ± 3.44            | 27.24 ± 3.18             | 26.15 ± 2.93             | 0.052          |
| TC (mmol/L)                    | 5.62 ± 1.02             | 5.58 ± 0.99              | 5.75 ± 1.01              | 0.649          |
| TAG (mmol/L)                   | 1.53 ± 0.87             | 1.44 ± 0.47              | 1.64 ± 0.76              | 0.230          |
| HDL-C (mmol/L)                 | 1.35 ± 0.42             | 1.41 ± 0.33              | 1.32 ± 0.43              | 0.128          |
| LDL-C (mmol/L)                 | 3.59 ± 0.96             | 3.50 ± 0.91              | 3.67 ± 1.04              | 0.596          |
| Glucose (mmol/L)               | 5.14 ± 0.69             | 5.12 ± 0.49              | 5.09 ± 0.53              | 0.708          |
| Insulin (pmol/L)               | 45.9 ± 30.0             | 49.9 ± 26.6              | 54.18 ± 36               | 0.298          |
| NEFA (μmol/L)                  | 530 ± 200               | 471 ± 171                | 519 ± 1738               | 0.145          |
| HOMA-IR                        | 1.87 ± 1.36             | 1.97 ± 1.11              | 2.13 ± 1.54              | 0.434          |
| TAG AUC (mmol/L × 480 min)     | 1086 ± 549              | 995 ± 369                | 1183 ± 518               | 0.040          |
| IAUC (mmol/L × 480 min)        | 321 ± 212               | 302 ± 215                | 361 ± 241                | 0.262          |
| NEFA AUC (mmol/L × 300 min)    | 155 ± 40                | 149 ± 33                 | 156 ± 59                 | 0.554          |
| IAUC (mmol/L × 300 min)        | 99 ± 33                 | 100 ± 27                 | 89 ± 55                  | 0.333          |
| Glucose AUC (mmol/L × 480 min) | 3109 ± 408              | 2831 ± 797               | 3057 ± 617               | 0.034          |
| IAUC (mmol/L × 480 min)        | 590 ± 287               | 454 ± 248                | 636 ± 260                | 0.051          |
| Insulin AUC (nmol/L × 480 min) | 128 ± 60                | 119 ± 38                 | 145 ± 169                | 0.948          |
| IAUC (nmol/L × 480 min)        | 105 ± 54                | 95 ± 303                 | 118 ± 164                | 0.967          |

Abbreviations: TC, total cholesterol; TAG, triacylglycerol; HDL-C, high density lipoprotein cholesterol; LDL-C, low density lipoprotein cholesterol; NEFA, non-esterified fatty acids; HOMA-IR, homeostasis model assessment-insulin resistance, AUC, area under the curve; IAUC, incremental area under the curve.

**Table S4.** List of postprandial studies determining the effects of *LPL* gene polymorphisms (*S447X* and *HindIII*) on fasting and postprandial lipids.

| Reference                              | Sample Size      | Meal Composition                                                                                                                         | <i>LPL</i> Polymorphism  | Outcome                                                                           | Association ( <i>p</i> Value) |
|----------------------------------------|------------------|------------------------------------------------------------------------------------------------------------------------------------------|--------------------------|-----------------------------------------------------------------------------------|-------------------------------|
| Lopez-Miranda <i>et al.</i> 2004 [1]   | 51               | High fat meal (60 g fat and 420 mg cholesterol—60% fat, 15% protein, and 25% carbohydrates)                                              | HindIII                  | Postprandial Small triacylglycerol-rich lipoproteins (TRL)-retinyl palmitate (RP) | <i>p</i> = 0.030              |
|                                        |                  |                                                                                                                                          |                          | S447X                                                                             | Small TRL-RP                  |
|                                        |                  |                                                                                                                                          | Large TRL-B48            |                                                                                   | <i>p</i> = 0.046              |
|                                        |                  |                                                                                                                                          | HindIII- S447X           | Small TRL-B48                                                                     | <i>p</i> = 0.048              |
|                                        |                  |                                                                                                                                          |                          | Fasting                                                                           | Triacylglycerol (TAG)         |
|                                        |                  |                                                                                                                                          | Large TRL-TG             | <i>p</i> = 0.048                                                                  |                               |
| Large TRL-RP                           | <i>p</i> = 0.004 |                                                                                                                                          |                          |                                                                                   |                               |
| Small TRL-RP                           | <i>p</i> = 0.014 |                                                                                                                                          |                          |                                                                                   |                               |
| Large TRL-B48                          | <i>p</i> = 0.036 |                                                                                                                                          |                          |                                                                                   |                               |
| Humphries <i>et al.</i> 1998 [2]       | 2181             | Oral liquid lipid load (42 g saturated fat, 22 g protein, 56 g carbohydrate, and 417 mg cholesterol)                                     | <i>H</i> -/ <i>X</i> 447 | Fasting TAG                                                                       | <i>p</i> = 0.01               |
|                                        |                  |                                                                                                                                          |                          | Postprandial TAG                                                                  | <i>p</i> < 0.05               |
| Anagnostopoulou <i>et al.</i> 2009 [3] | 80               | High fat meal (5.3 g protein, 24.75 g carbohydrate, 240 mg cholesterol, and 65.2 g fat—83.5% fat, 14.0% carbohydrates and 2.5% proteins) | S447X                    | Fasting / Postprandial TAG                                                        | No association                |
